# Supplementary material
Source: PubMed Central journal article supplement (PMC5780059)
Supplement: DB161356SupplementaryData.pdf [file DB161356SupplementaryData.pdf]

SUPPLEMENTARY DATA

**Supplementary Figure 1.** Delta  $\text{Ca}^{2+}$  rises in response to glucose and KCl at high glucose in glucocorticoid-treated islets. *A*: Glucocorticoids significantly impair the amplitude of  $\text{Ca}^{2+}$  responses to glucose. *B*: As for *A*, but  $\text{Ca}^{2+}$  responses to 10 mM KCl (amplitude measured *versus* 17 mM glucose; G17). \* $P < 0.05$ , \*\* $P < 0.01$  and NS, non-significant; one-way ANOVA (Bonferroni's post hoc test). 11-DHC and corticosterone were applied at 200 nM or 20 nM, respectively. Data represent the mean  $\pm$  S.D. N numbers as for Figure 1.

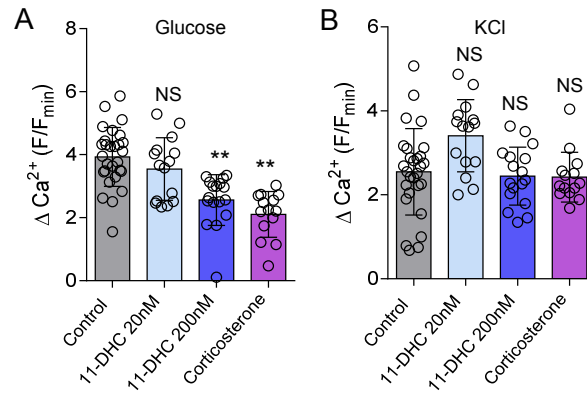

**Supplementary Figure 2.** Glucocorticoids impair  $\text{Ca}^{2+}$  responses to glucose and KCl at high glucose as measured using Fura2. *A*: Ratimetric Fura2 recordings showing glucose- and glucose + 10 mM KCl-stimulated  $\text{Ca}^{2+}$  rises in mouse islets treated for 48 hrs with 11-DHC or corticosterone (mean  $\pm$  S.E.M intensity-over-time traces shown) ( $n = 16-17$  islets from 4 animals). *B-C*: Summary bar graphs showing a significant reduction in the amplitude of glucose- (*B*) and 10 mM KCl- (*C*) stimulated  $\text{Ca}^{2+}$  rises following treatment with either glucocorticoid (KCl amplitude measured *versus* 17 mM glucose; G17). *D*: Peak  $\text{Ca}^{2+}$  responses to 10 mM KCl at low (3 mM) glucose are not affected or significantly increased by 11-DHC or corticosterone exposure, respectively. Sustained  $\text{Ca}^{2+}$  responses to 10 mM KCl at low (3 mM) glucose are significantly increased by both glucocorticoids. *E*: As for *D*, but summary bar graph (peak  $\text{Ca}^{2+}$  responses, left panel; sustained  $\text{Ca}^{2+}$  responses, right panel) ( $n = 7-9$  islets from 2 animals). *F*: Peak and sustained  $\text{Ca}^{2+}$  responses to 30 mM KCl at low (3 mM) glucose are significantly reduced by treatment with 11-DHC or corticosterone ( $n = 31-35$  islets from 9 animals). *G*: As for *F*, but summary bar graph (peak  $\text{Ca}^{2+}$  responses, left panel; sustained  $\text{Ca}^{2+}$  responses, right panel) ( $n = 31-35$  islets from 9 animals). *H*: Glucocorticoid does not significantly alter the Fura2 340/385 ratio ( $n = 8-10$  islets from 3 animals). G3 = 3 mM glucose; G17 = 17 mM glucose. \*\* $P < 0.01$  and NS, non-significant; one-way ANOVA (Bonferroni's posthoc test). 11-DHC and corticosterone were applied for 48 hrs at 200 nM or 20 nM, respectively. Unless otherwise stated, data represent the mean  $\pm$  S.D.

SUPPLEMENTARY DATA

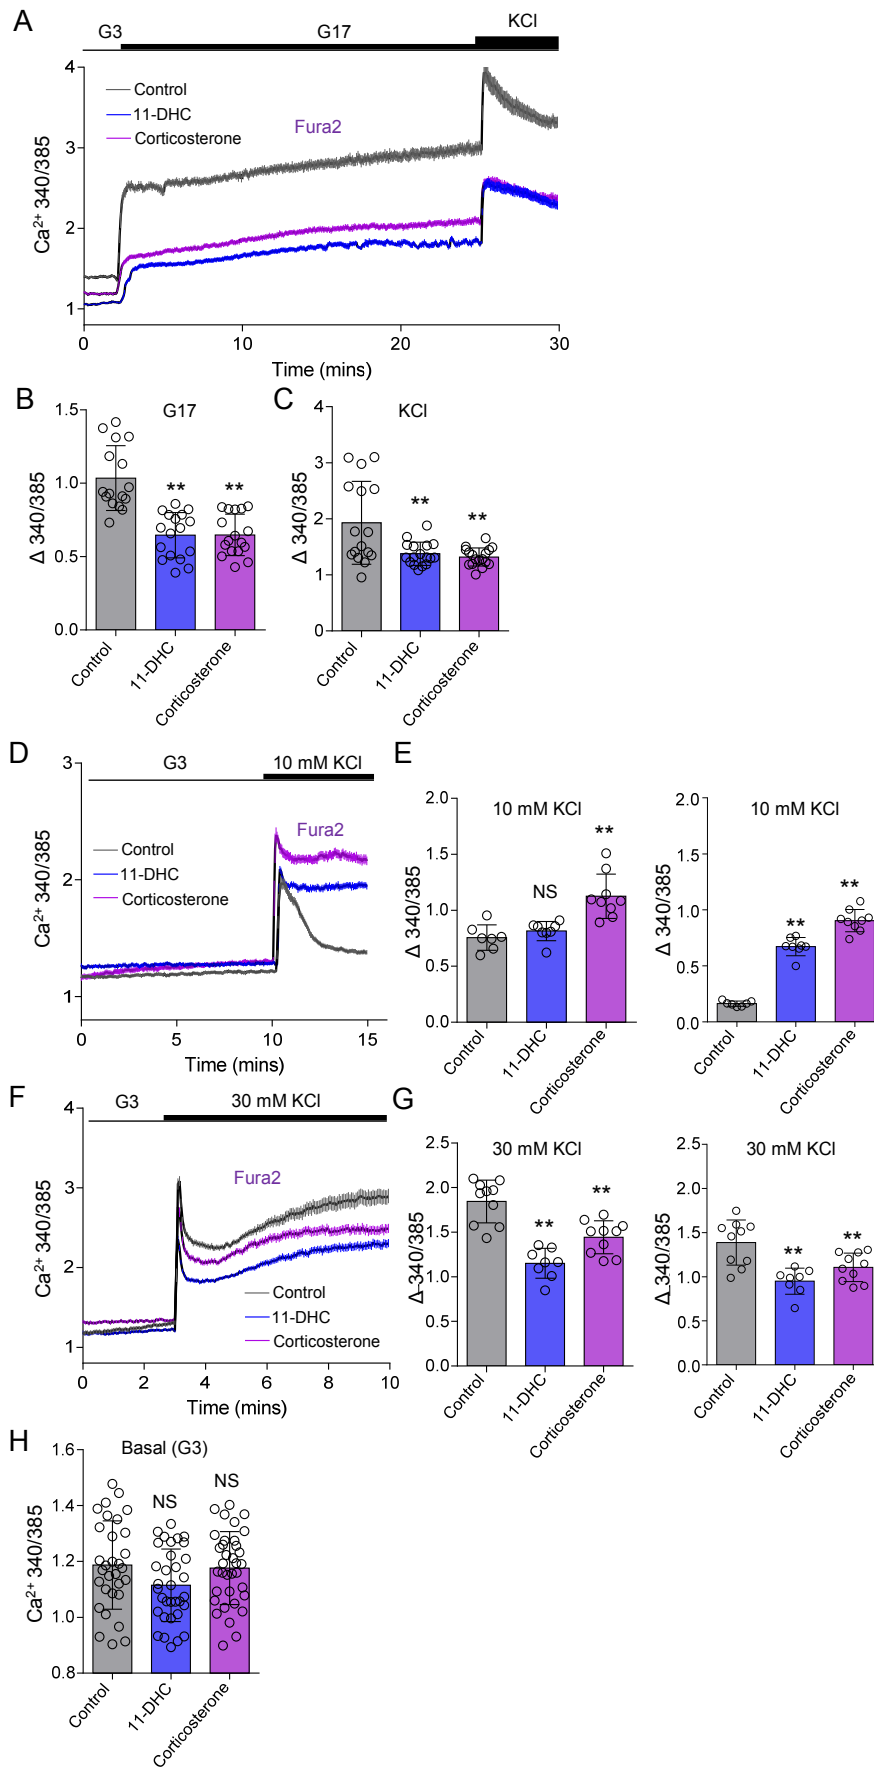

SUPPLEMENTARY DATA

**Supplementary Figure 3.** Glucocorticoids do not influence the time to onset or amplitude of ATP/ADP responses to glucose. *A:* Bar graph showing no effect of 11-DHC or corticosterone (Cort) on the time to the initial decrease in ATP/ADP. *B:* As for, A but amplitude of the decrease. 11-DHC and corticosterone were applied for 48 hrs at 200 nM or 20 nM, respectively. NS, non-significant; one-way ANOVA (Bonferroni's posthoc test). Data represent the mean  $\pm$  S.D.

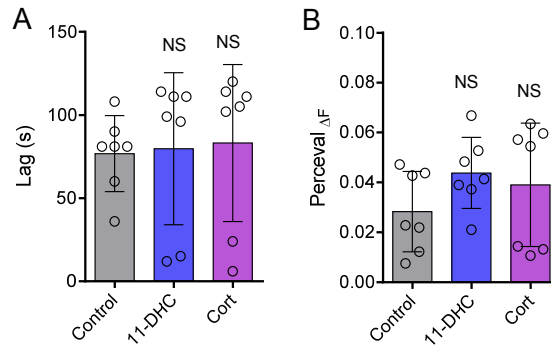

**Supplementary Figure 4.** Glucocorticoids do not affect glucose-stimulated ATP production. High (17 mM) glucose concentration significantly increases ATP levels under all conditions examined. No differences were detected between control-, 11-DHC- and corticosterone-treated islets ( $n = 12$  animals). 11-DHC and corticosterone were applied for 48 hrs at 200 nM or 20 nM, respectively. \* $P < 0.05$ , \*\* $P < 0.01$ ; Student's t-test. NS, non-significant; one-way ANOVA. Data represent the mean and range.

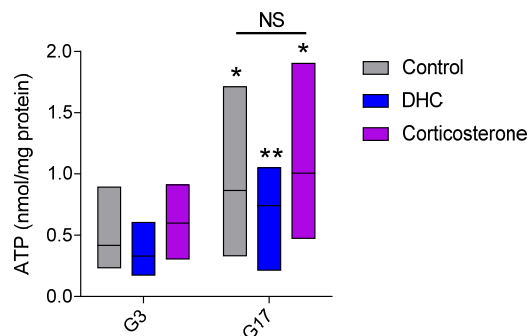

**Supplementary Figure 5.** *Hsd11b1* and *HSD11B1* mRNA expression in mouse and human tissue. *A:* Relative *Hsd11b1* gene expression in muscle, liver and islets in mice ( $n = 5$  animals). *B:* *Hsd11b1* is expressed in islets from *Hsd11b1*<sup>+/+</sup> and *Hsd11b1*<sup>+/-</sup> mice, but not *Hsd11b1*<sup>-/-</sup> animals ( $n = 3-4$  animals). *C:* *HSD11B1* levels in human islets are only an order of magnitude lower than in subcutaneous (SC) and omental (OM) fat ( $n = 4-5$  donors). Data represent the mean  $\pm$  S.D.

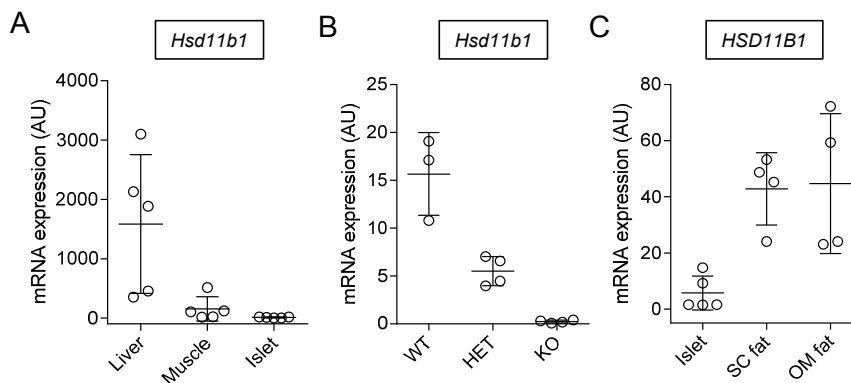

SUPPLEMENTARY DATA

**Supplementary Figure 6.** 11-DHC suppresses delta  $\text{Ca}^{2+}$  rises in *Hsd11b1*<sup>+/-</sup> but not *Hsd11b1*<sup>-/-</sup> islets. *A*: Both 11-DHC and corticosterone significantly impair the amplitude of  $\text{Ca}^{2+}$  responses to glucose in *Hsd11b1*<sup>+/-</sup> islets. *B*: As for *A*, but 10 mM KCl (amplitude measured versus 17 mM glucose; G17). *C*: Deletion of *Hsd11b1* (*Hsd11b1*<sup>-/-</sup>) restores  $\text{Ca}^{2+}$  responses to glucose. *D*: As for *A*, but 10 mM KCl (amplitude measured versus 17 mM glucose; G17). Data represent the mean  $\pm$  S.D. \* $P < 0.05$ , \*\* $P < 0.01$  and NS, non-significant; one-way ANOVA (Bonferroni's post hoc test). 11-DHC and corticosterone were applied for 48 hrs at 200 nM or 20 nM, respectively. Data represent the mean  $\pm$  S.D. N numbers as for Figure 5.

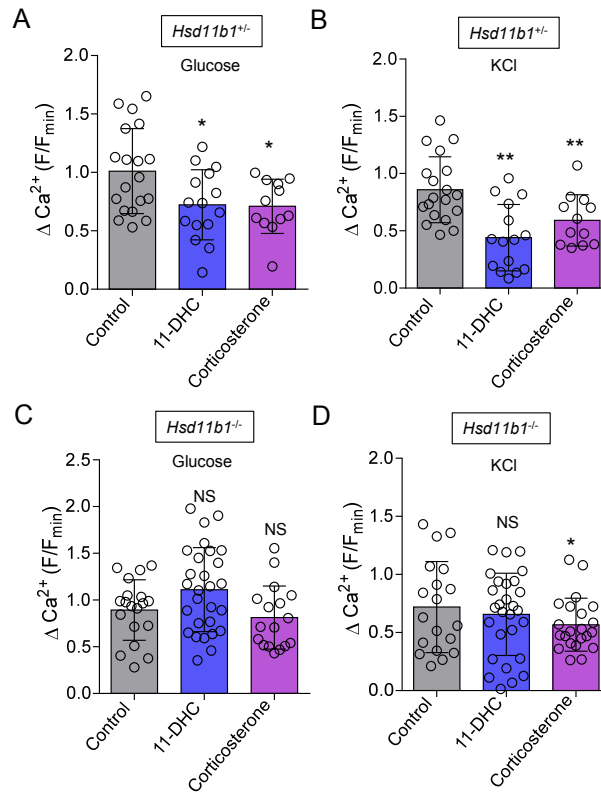

SUPPLEMENTARY DATA

**Supplementary Figure 7.** 11-DHC augments delta cAMP rises in *Hsd11b1*<sup>+/-</sup> but not *Hsd11b1*<sup>-/-</sup> islets. **A:** Both 11-DHC and corticosterone potentiate cAMP responses to glucose in *Hsd11b1*<sup>+/-</sup> islets. **B:** Only corticosterone potentiates cAMP responses to glucose in *Hsd11b1*<sup>-/-</sup> islets. \*P<0.05, \*\*P<0.01 and NS, non-significant; one-way ANOVA (Bonferroni's post hoc test). 11-DHC and corticosterone were applied for 48 hrs at 200 nM or 20 nM, respectively. Data represent the mean ± S.D. N numbers as for Figure 6.

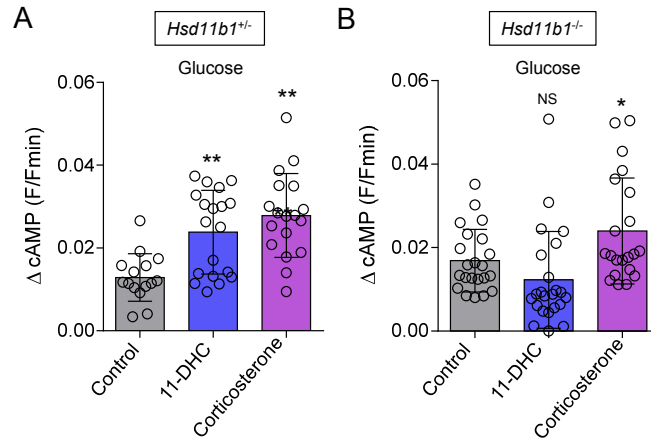

**Supplementary Figure 8.** R486 blocks the effects of glucocorticoids on Ca<sup>2+</sup> rises. **A:** RU486 prevents 11-DHC from impairing Ca<sup>2+</sup> responses to glucose. **B:** As for A, but 10 mM KCl (amplitude measured versus 17 mM glucose; G17). **C:** RU486 prevents corticosterone (Cort) from impairing Ca<sup>2+</sup> responses to glucose. **D:** As for C, but 10 mM KCl (amplitude measured versus G17). \*P<0.05, \*\*P<0.01 and NS, non-significant; one-way ANOVA (Bonferroni's post hoc test). 11-DHC and corticosterone were applied for 48 hrs at 200 nM or 20 nM, respectively. Data represent the mean ± S.D. N numbers as for Figure 7.

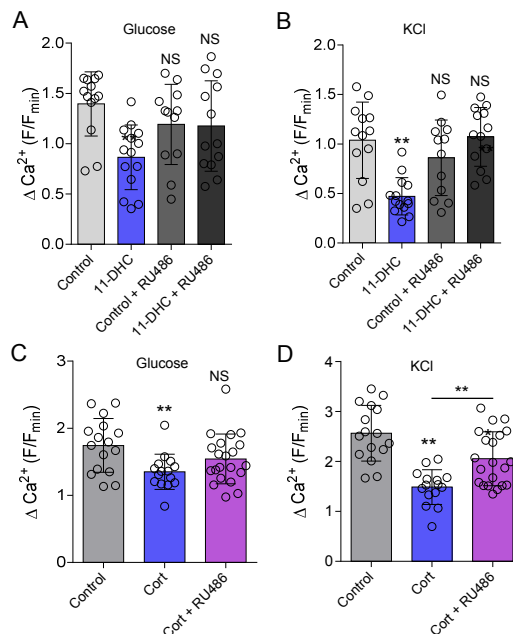

SUPPLEMENTARY DATA

**Supplementary Table 1.** Human islet donor characteristics.

| Age | Gender | BMI  | Source  |
|-----|--------|------|---------|
| 55  | F      | 26   | Milan   |
| 49  | F      | 23.9 | Milan   |
| 73  | F      | 28.4 | Alberta |
| 71  | F      | 35.5 | Alberta |
| 54  | M      | 26.5 | Milan   |
| 57  | F      | 26   | Milan   |
| 64  | M      | 24.5 | Pisa    |
| 44  | M      | 34.4 | Alberta |

**Supplementary Table 2.** Epac2-camps single and dual channel fluorescence in mouse islets during maximal stimulation with forskolin. NS, non-significant *versus* control, one-way ANOVA (Bonferroni's post hoc test).

| Treatment      | YFP intensity $\pm$ SD (AU)              | CFP/YFP $\pm$ SD   |
|----------------|------------------------------------------|--------------------|
| Control        | $2.3 \times 10^4 \pm 6.7 \times 10^3$    | $1.08 \pm 0.03$    |
| 11-DHC         | $2.4 \times 10^4 \pm 8.8 \times 10^3$ NS | $1.08 \pm 0.05$ NS |
| Corticosterone | $2.7 \times 10^4 \pm 5.0 \times 10^3$ NS | $1.07 \pm 0.04$ NS |

**Supplementary Table 3.** Primer sequences

| Gene                            | Forward                 | Reverse                  |
|---------------------------------|-------------------------|--------------------------|
| <i>Ins1</i>                     | GCTGGTGGGCATCCAGTAA     | AATGACCTGCTTGCTGATGGT    |
| <i>Pdx-1</i>                    | CAAAGCTCACGCGTGGA       | TGTTTTCCCTCGGGTTCCG      |
| <i>Nkx6.1</i>                   | GCCTGTACCCCCATCAAG      | GTGGGTCTGGTGTGTTTTCTCTT  |
| <i>Cacna1d</i>                  | GAAGCTGCTTGACCAAGTTGT   | AACTTCCCCACGGTTACCTC     |
| <i>Cacna1c</i>                  | CCAACCTCATCCTCTTCTTCA   | ACATAGTCTGCATTGCCTAGGAT  |
| <i>Cacnb2</i>                   | GCAGGAGAGCCAGATGGA      | TCCTGGCTCCTTTTCCATAG     |
| <i>Adcy1</i>                    | CGGAATTGCATGCCTTGAA     | TCCATTCTTTTGTGCATGCTACAT |
| <i>Adcy5</i>                    | CTTACCAGCCCCAAGAAAC     | GAAGCGGCAGAGCACAGAAC     |
| <i>Adcy6</i>                    | AGCCTTGATAGGAAGGGACTACT | CTCCCTGCTTTGGCTTATATACCT |
| <i>Adcy8</i>                    | TTGGGCTTCTACACCTTGACT   | CGGTAGCTGTATCCTCCATTGAG  |
| <i>Adcy9</i>                    | CATACAGAAGGCACCGATAG    | CCGAACAGGTCATTGAGTAG     |
| <i><math>\beta</math>-actin</i> | CGAGTCGCGTCCACCC        | CATCCATGGCGAACTGGTG      |

SUPPLEMENTARY DATA

**Supplementary Table 4.** Basal intracellular  $\text{Ca}^{2+}$  concentration in human islets. Free  $\text{Ca}^{2+}$  concentrations were calculated using  $K_d \cdot (F - F_{\min}) / (F_{\max} - F)$  where  $F_{\max}$  and  $F_{\min}$  represent fluorescence in the presence of 10  $\mu\text{M}$  ionomycin or 0.1% Triton + 5 mM EGTA, respectively, and  $K_d = 389$  nM. NS, non-significant *versus* control, one-way ANOVA (Bonferroni's post hoc test).

| Treatment | $\text{Ca}^{2+}$ concentration $\pm$ SD (nM) |
|-----------|----------------------------------------------|
| Control   | 61.1 $\pm$ 16.2                              |
| Cortisone | 60.9 $\pm$ 18.2 <sup>NS</sup>                |
| Cortisol  | 52.7 $\pm$ 19.8 <sup>NS</sup>                |

**Supplementary Table 5.** Effect of KCl concentration on amplitude  $\text{Ca}^{2+}$  responses at 3 mM glucose. \*\* $P < 0.01$  *versus* 3 mM glucose + 10 mM KCl, Student's t-test.

| Treatment                | $\Delta\text{Ca}^{2+} \pm$ SD (340/385) |
|--------------------------|-----------------------------------------|
| 3 mM glucose + 10 mM KCl | 0.76 $\pm$ 0.12                         |
| 3 mM glucose + 30 mM KCl | 1.85 $\pm$ 0.24**                       |
